# Supplementary material for: Basic ionic liquids: a new type of ligand and catalyst for the AGET ATRP of methyl methacrylate
Source: Royal Society of Chemistry journal article supplement (doi:10.1039/c2py20262j), 2012-01-01
Supplement: c2py20262j.pdf [file c2py20262j.pdf]

## Electronic Supplementary Information

### Basic Ionic Liquids: a New Type of Ligand and Catalyst for the AGET ATRP of Methyl Methacrylate

Zhijun Deng, Jiangna Guo, Lihua Qiu, Yinxia Zhou, Lin Xia and Feng Yan\*

Jiangsu Key Laboratory of Advanced Functional Polymer Design and Application, Department of Polymer Science and Engineering, College of Chemistry, Chemical Engineering and Materials Science, Soochow University, Suzhou, 215123, PR China

E-mail: fyan@suda.edu.cn

**Table S1** Bulk AGET ATRP of MMA with TBPBr as the Ligand<sup>a</sup>

| Entry          | Conversion (%) | $M_{n,GPC}$ (g/mol) | $M_{n,th}$ (g/mol) | $M_w/M_n$ |
|----------------|----------------|---------------------|--------------------|-----------|
| A <sup>b</sup> | 8.4            | 5270                | 2100               | 1.29      |
| B <sup>c</sup> | 29.8           | 8100                | 7460               | 1.34      |
| C <sup>c</sup> | 27.1           | 7760                | 6780               | 1.21      |
| D <sup>c</sup> | 24.2           | 7620                | 6060               | 1.18      |
| E <sup>c</sup> | 19.9           | 7950                | 4980               | 1.16      |

<sup>a</sup> Polymerization temperature: 60 °C, polymerization time: 60 h, MMA: 2 mL

<sup>b</sup> [MMA]<sub>0</sub>/[EBiB]<sub>0</sub>/[FeCl<sub>3</sub>·6H<sub>2</sub>O]<sub>0</sub>/[TBABr]<sub>0</sub>/[VC]<sub>0</sub> = 250/1/1/2/2

<sup>c</sup> [MMA]<sub>0</sub>/[EBiB]<sub>0</sub>/[FeCl<sub>3</sub>·6H<sub>2</sub>O]<sub>0</sub>/[TBABr]<sub>0</sub>/[VC]<sub>0</sub>/[BILs]<sub>0</sub> = 250/1/1/2/2/10.8;

BILs: (B) [Bmim][OH]; (C) [Bmim][PO<sub>4</sub>]; (D) [Bmim][CO<sub>3</sub>]; (E) [Bmim][HCO<sub>3</sub>]

**Table S2** Effect of the ratio of  $[[\text{Bmim}][\text{PO}_4]]_0/[\text{FeCl}_3 \cdot 6\text{H}_2\text{O}]_0$  on the polymerization of MMA<sup>a</sup>

| Entry | $[[\text{Bmim}][\text{PO}_4]]_0/[\text{FeCl}_3 \cdot 6\text{H}_2\text{O}]_0$ | Conversion (%) | $M_{n,\text{GPC}}$ (g/mol) | $M_{n,\text{th}}$ (g/mol) | $M_w/M_n$ |
|-------|------------------------------------------------------------------------------|----------------|----------------------------|---------------------------|-----------|
| 1     | 2/1                                                                          | 5.9            | 2440                       | 1480                      | 1.26      |
| 2     | 4/1                                                                          | 10.4           | 3540                       | 2600                      | 1.34      |
| 3     | 6/1                                                                          | 15.8           | 4400                       | 3950                      | 1.38      |
| 4     | 10/1                                                                         | 25.8           | 6620                       | 6460                      | 1.41      |
| 5     | 14/1                                                                         | 44.4           | 12160                      | 11110                     | 1.51      |
| 6     | 18/1                                                                         | 67.7           | 19200                      | 16940                     | 1.62      |

<sup>a</sup>Polymerization conditions:  $[\text{MMA}]_0/[\text{EBiB}]_0/[\text{FeCl}_3 \cdot 6\text{H}_2\text{O}]_0/[[\text{Bmim}][\text{PO}_4]]_0/[\text{VC}]_0 = 250/1/1/x/2$

( $x = 2, 4, 6, 10, 14, 18$ ), MMA: 2 mL, temperature: 60 °C, polymerization time: 18 h.

**Table S3** Effect of the ratio of  $[[\text{Bmim}][\text{CO}_3]]_0/[\text{FeCl}_3 \cdot 6\text{H}_2\text{O}]_0$  on the polymerization of MMA<sup>a</sup>

| Entry | $[[\text{Bmim}][\text{CO}_3]]_0/[\text{FeCl}_3 \cdot 6\text{H}_2\text{O}]_0$ | Conversion (%) | $M_{n,\text{GPC}}$ (g/mol) | $M_{n,\text{th}}$ (g/mol) | $M_w/M_n$ |
|-------|------------------------------------------------------------------------------|----------------|----------------------------|---------------------------|-----------|
| 1     | 2/1                                                                          | 4.6            | 2130                       | 1150                      | 1.26      |
| 2     | 4/1                                                                          | 7.1            | 2760                       | 1780                      | 1.32      |
| 3     | 6/1                                                                          | 10.2           | 3900                       | 2550                      | 1.35      |
| 4     | 10/1                                                                         | 20.6           | 10240                      | 5160                      | 1.39      |
| 5     | 16/1                                                                         | 43.7           | 17910                      | 10940                     | 1.46      |
| 6     | 22/1                                                                         | 72.5           | 28360                      | 18140                     | 1.57      |

<sup>a</sup>Polymerization conditions:  $[\text{MMA}]_0/[\text{EBiB}]_0/[\text{FeCl}_3 \cdot 6\text{H}_2\text{O}]_0/[[\text{Bmim}][\text{CO}_3]]_0/[\text{VC}]_0 = 250/1/1/x/2$

( $x = 2, 4, 6, 10, 16, 22$ ), MMA: 2 mL, temperature: 60 °C, polymerization time: 18 h.

**Table S4** Effect of the ratio of  $[[\text{Bmim}][\text{HCO}_3]]_0/[\text{FeCl}_3 \cdot 6\text{H}_2\text{O}]_0$  on the polymerization of MMA<sup>a</sup>

| Entry | $[[\text{Bmim}][\text{HCO}_3]]_0/[\text{FeCl}_3 \cdot 6\text{H}_2\text{O}]_0$ | Conversion (%) | $M_{n,\text{GPC}}$ (g/mol) | $M_{n,\text{th}}$ (g/mol) | $M_w/M_n$ |
|-------|-------------------------------------------------------------------------------|----------------|----------------------------|---------------------------|-----------|
| 1     | 2/1                                                                           | 3.1            | 1960                       | 780                       | 1.22      |
| 2     | 4/1                                                                           | 5.4            | 2080                       | 1350                      | 1.23      |
| 3     | 8/1                                                                           | 8.6            | 4230                       | 2150                      | 1.24      |
| 4     | 10/1                                                                          | 14.2           | 4600                       | 3550                      | 1.37      |
| 5     | 14/1                                                                          | 31.7           | 12270                      | 7930                      | 1.38      |
| 6     | 18/1                                                                          | 44.5           | 18370                      | 11140                     | 1.41      |
| 7     | 24/1                                                                          | 76.4           | 29730                      | 19120                     | 1.54      |

<sup>a</sup>Polymerization conditions:  $[\text{MMA}]_0/[\text{EBiB}]_0/[\text{FeCl}_3 \cdot 6\text{H}_2\text{O}]_0/[[\text{Bmim}][\text{HCO}_3]]_0/[\text{VC}]_0 = 250/1/1/x/2$

( $x = 2, 4, 6, 10, 14, 18, 24$ ), MMA: 2 mL, temperature: 60 °C, polymerization time: 18 h.

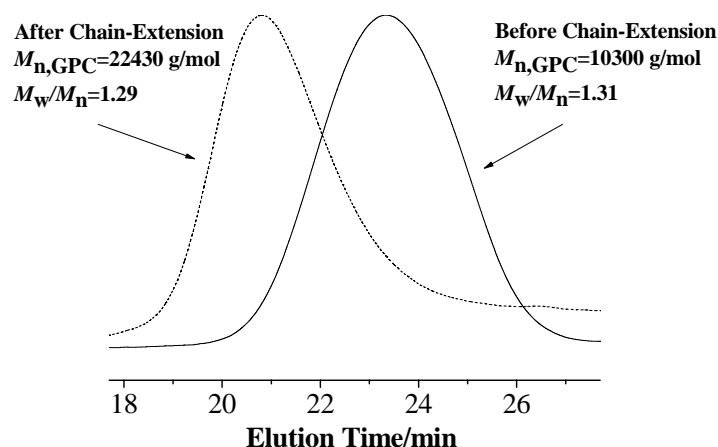

**Figure S1.** GPC traces of before and after chain extension using PMMA prepared by AGET ATRP of MMA (using  $[\text{Bmim}][\text{PO}_4]$  as the ligand) as the macroinitiator. Polymerization conditions for macroinitiator PMMA:  $[\text{MMA}]_0/[\text{EBiB}]_0/[\text{FeCl}_3 \cdot 6\text{H}_2\text{O}]_0/[[\text{Bmim}][\text{PO}_4]]_0/[\text{VC}]_0 = 250/1/1/6/2$ , MMA: 2 mL, conversion: 44.2%, time: 82 h,  $M_{n,\text{GPC}} = 10300$  g/mol,  $M_w/M_n = 1.31$ ; for chain extension:  $[\text{MMA}]_0/[\text{PMMA}]_0/[\text{FeCl}_3 \cdot 6\text{H}_2\text{O}]_0/[[\text{Bmim}][\text{PO}_4]]_0/[\text{VC}]_0 = 250/0.25/1/6/2$ , MMA: 2 ml, time: 48 h, conversion: 26.6%, temperature: 60 °C.

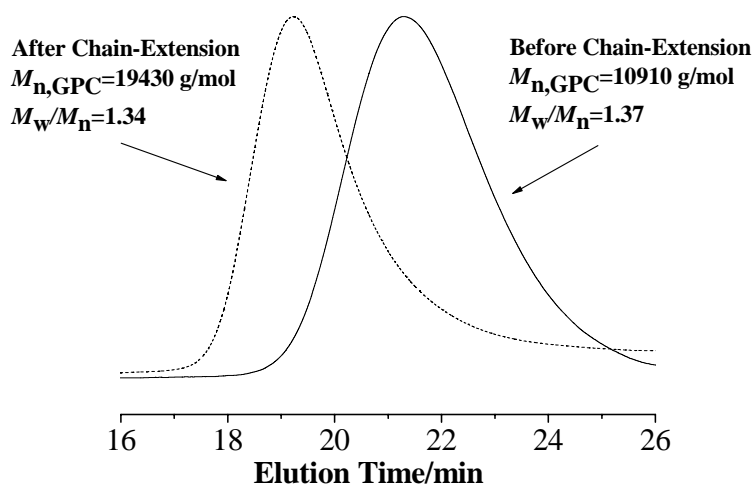

**Figure S2.** GPC traces of before and after chain extension using PMMA prepared by AGET ATRP of MMA (using [Bmim][CO<sub>3</sub>] as the ligand) as the macroinitiator. Polymerization conditions for macroinitiator PMMA: [MMA]<sub>0</sub>/[EBiB]<sub>0</sub>/[FeCl<sub>3</sub>·6H<sub>2</sub>O]<sub>0</sub>/[[Bmim][CO<sub>3</sub>]]<sub>0</sub>/[VC]<sub>0</sub> = 250/1/1/6/2, MMA: 2 mL, conversion: 37.4%, time: 86 h,  $M_{n, GPC} = 10910$  g/mol,  $M_w/M_n = 1.37$ ; for chain extension: [MMA]<sub>0</sub>/[PMMA]<sub>0</sub>/[FeCl<sub>3</sub>·6H<sub>2</sub>O]<sub>0</sub>/[[Bmim][CO<sub>3</sub>]]<sub>0</sub>/[VC]<sub>0</sub> = 250/0.25/1/6/2, MMA: 2 ml, time: 48 h, conversion: 23.6%, temperature: 60 °C.

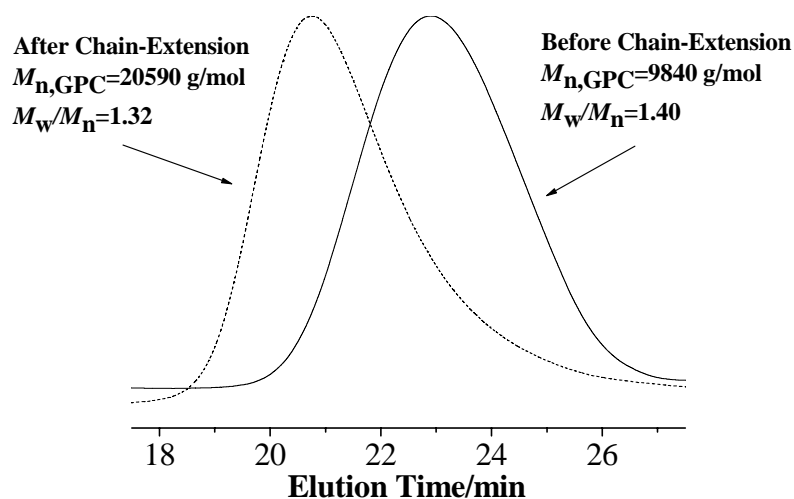

**Figure S3.** GPC traces of before and after chain extension using PMMA prepared by AGET ATRP of MMA (using [Bmim][HCO<sub>3</sub>] as the ligand) as the macroinitiator. Polymerization conditions for macroinitiator PMMA: [MMA]<sub>0</sub>/[EBiB]<sub>0</sub>/[FeCl<sub>3</sub>·6H<sub>2</sub>O]<sub>0</sub>/[[Bmim][HCO<sub>3</sub>]]<sub>0</sub>/[VC]<sub>0</sub> = 250/1/1/6/2, MMA: 2 mL, conversion: 40.2%, time: 78 h,  $M_{n, GPC} = 9840$  g/mol,  $M_w/M_n = 1.40$ ; for chain extension: [MMA]<sub>0</sub>/[PMMA]<sub>0</sub>/[FeCl<sub>3</sub>·6H<sub>2</sub>O]<sub>0</sub>/[[Bmim][HCO<sub>3</sub>]]<sub>0</sub>/[VC]<sub>0</sub> = 250/0.25/1/6/2, MMA: 2 ml, time: 48 h, conversion: 28.7%, temperature: 60 °C.
